# Supplementary material
Source: publisher figshare collection journal article supplement (https://acs.figshare.com/ndownloader/files/4714708)

## Supporting Information

### A Tightly Convolutd Polymeric Phosphotungstate Catalyst: An Oxidative Cyclization of Alkenols and Alkenoic Acids

Yoichi M. A. Yamada, Haiqing Guo and Yasuhiro Uozumi\*

Institute for Molecular Science (IMS), Myodaiji, Okazaki, Aichi 444-8787, Japan

#### Preparation of Solid-phase Tungsten Catalyst **3**

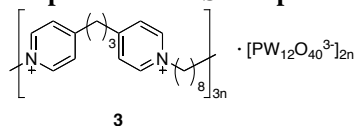

To an aqueous solution (30 mL) of poly[1,8-dibromooctane-co-1,3-di(4-pyridyl)propane] (**1**) (148 mg; 0.63 mmol of a pyridinium unit) was added an aqueous solution (70 mL) of  $\text{H}_3\text{PW}_{12}\text{O}_{40}$  (**2**) (608 mg; 0.21 mmol) at 25 °C, and the resulting colorless suspension was stirred for 3 days at the same temperature. The precipitates were collected by filtration, washed with water and dried at 5 Pa for 12 h to give **3** (624 mg; 83%) as a colorless powder.

MAS  $^{31}\text{P}\{^1\text{H}\}$  NMR (162 MHz;  $\text{CDCl}_3$ ):  $\delta$  -16.5 ppm; IR (ATR)  $\nu$  3727, 3624, 3062, 2927, 2858, 1638, 1572, 1514, 1469, 1172, 1077, 974, 892, 792,  $\text{cm}^{-1}$ ; Anal. calcd. for  $(\text{C}_{63}\text{H}_{90}\text{N}_6\text{P}_2\text{W}_{24}\text{O}_{80})_n$ : C 11.32%, H 1.36%, N 1.26%, found: C 12.45%, H 1.60%, N 1.32%

#### General Procedure for the Oxidative Cyclization of Alkenols **4** or Alkenoic Acids **6**

To a suspension of **3** (13 mg) in 30% aq  $\text{H}_2\text{O}_2$  (5 mmol) was added **4** or **6** (2 mmol) (and mesitylene (an internal standard for the determination of a GC yield)), and the resulting suspension was stirred at 50 °C for 24 h. After the reaction mixture was cooled to 25 °C, *t*-butyl methyl ether was added, and the resultant organic layer was separated by decantation. After the addition and extraction process were carried out for three times, the combined organic layer was subjected to GC-MS analysis for the determination of a GC yield (for **5a**, **5b**, **5c** and **5d**). The organic layer was washed with sat. aqueous  $\text{Na}_2\text{S}_2\text{O}_3$ , dried over  $\text{MgSO}_4$ , dried in vacuo, and purified by silica gel column chromatography to give the cyclized product (for **5e**, **5f**, **5g**, **7a**, **7b** and **7c**). The recovered **3** was dried in vacuo, and subjected to the next series of the reaction under similar reaction conditions.

#### CAS registry #:

**1**: 158400-75-0; **2**: 12501-23-4; **4a**: 928-91-6; **4b**: 6191-71-5; **4c**: 57074-37-0; **4d**: 64275-73-6; **4e**: 10339-62-5; **4f**: 92051-77-9; **4g**: 854001-04-0; **5a**: 16765-41-6; **5b**: 33964-64-6; **5c**: 143493-19-0; **5d**: 157756-84-8; **5e**: 143264-37-3; **5f**: 144539-31-1/144539-30-0; **5g**: 854000-82-1; **6a**: 41653-95-6; **6b**: 505-90-8; **6c**: 57602-94-5; **7a**: 97101-23-0; **7b**: 82309-35-1; **7c**: 82309-34-0

## MAS $^{31}\text{P}$ NMR of 3

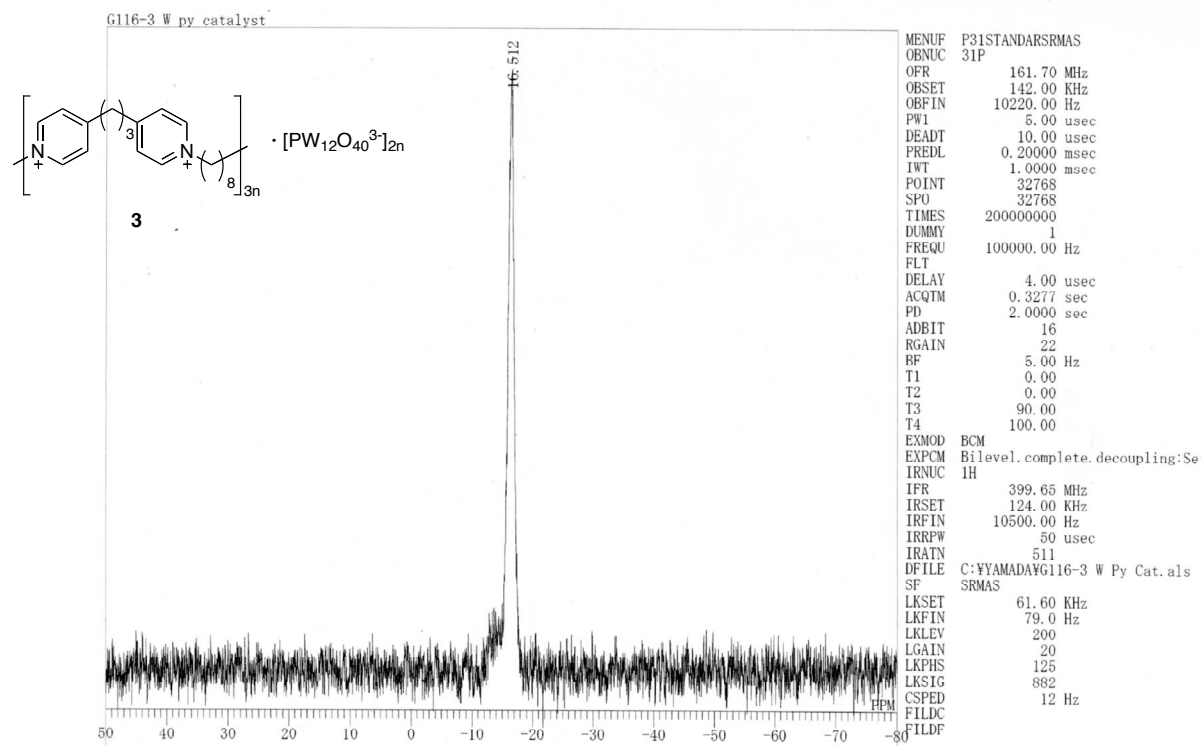

## SEM images of 3

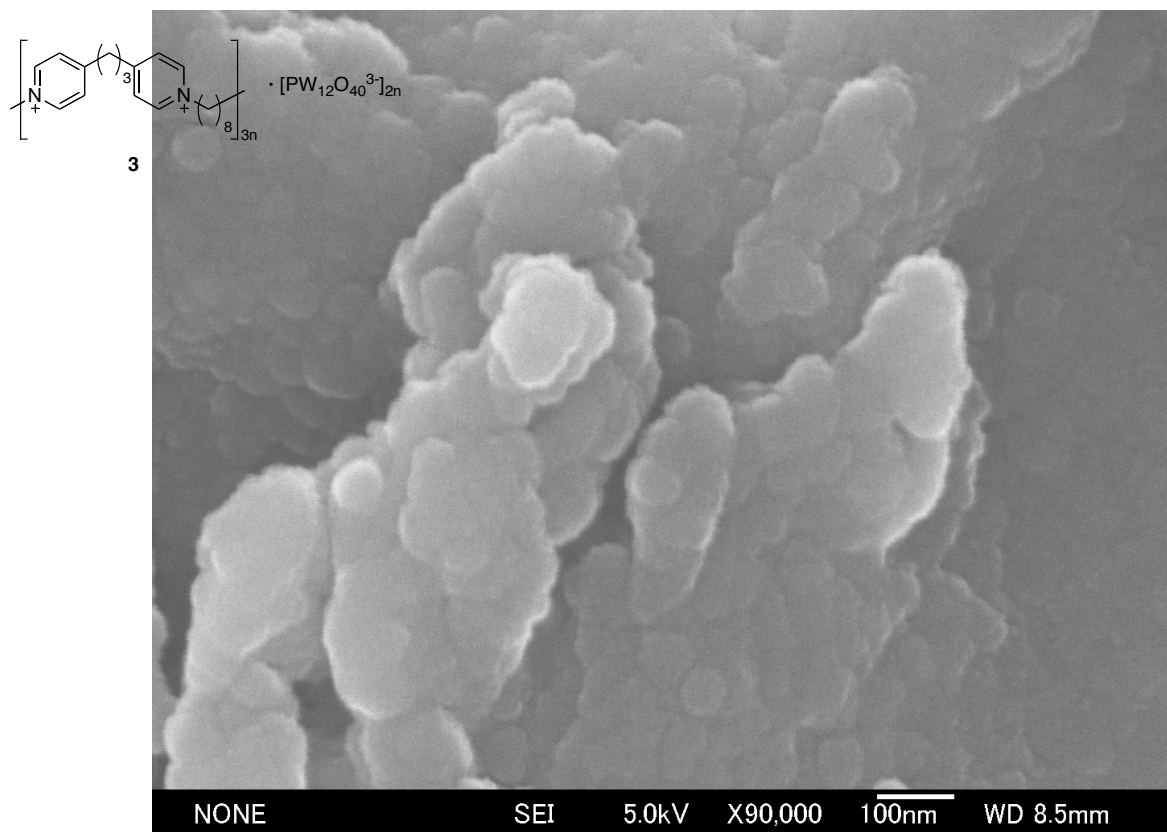

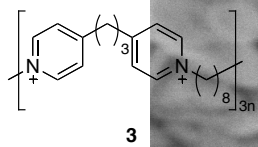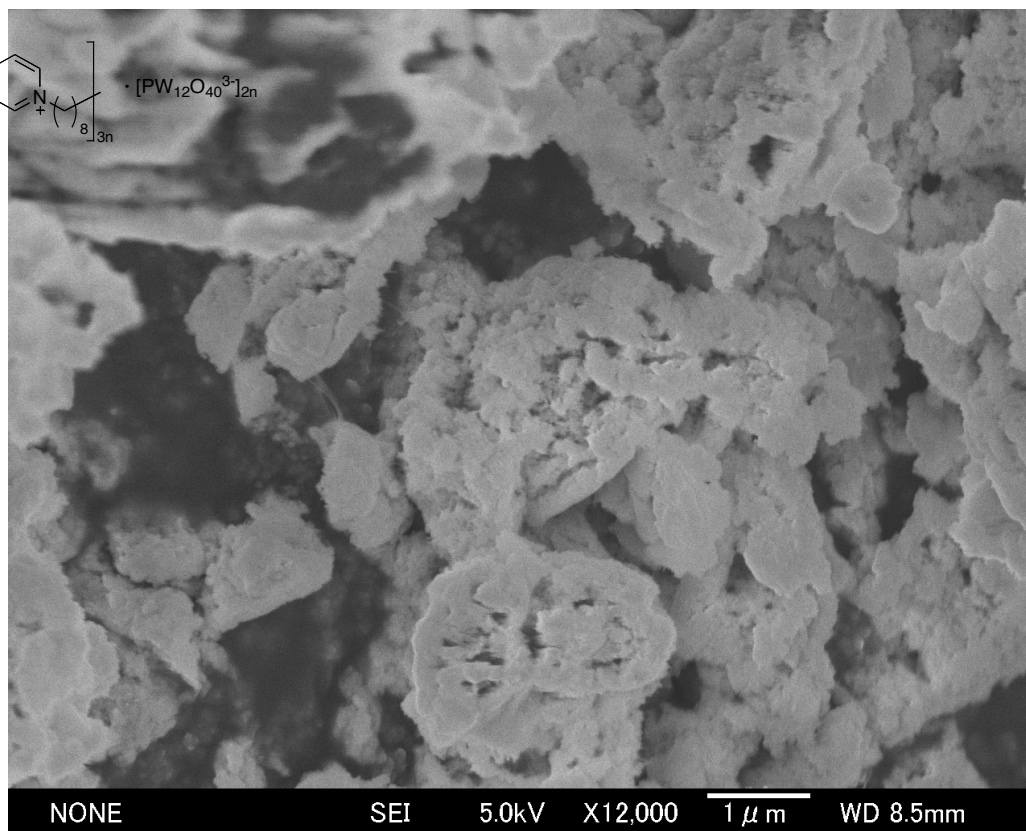

### GC-MS charts of the isolated products (5e, 5f, 5g, 7a, 7b and 7c)

**5e**

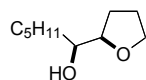

File : C:\MSDCHEM\1\DATA\GUO\246#-3.D  
 Operator : Guo  
 Acquired : 9 Feb 2005 15:34 using AcqMethod UOZUMI1  
 Instrument : Instrumen  
 Sample Name: 246#-3  
 Misc Info : C,C, 17tube  
 Vial Number: 1

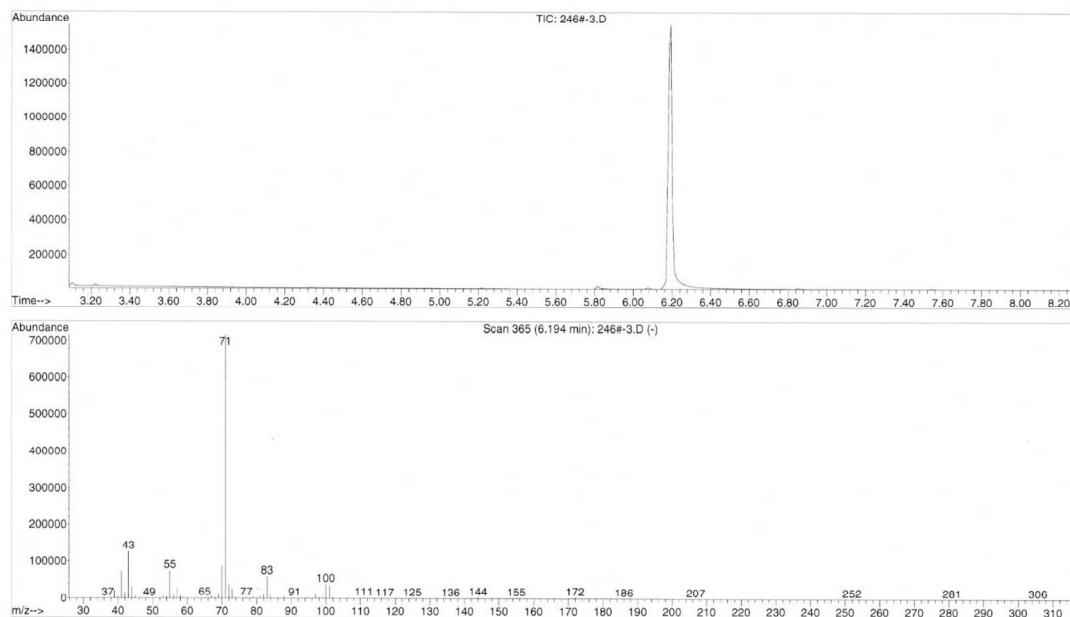

**5f** (*cis* and *trans* isomers)

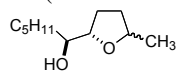

File : C:\MSDCHEM\1\DATA\GUO\219#-3.D  
Operator : Guo  
Acquired : 24 Dec 2004 00:44 using AcqMethod UOZUM11  
Instrument : Instrumen  
Sample Name: 219#-3  
Misc Info : C.C., collection  
Vial Number: 1

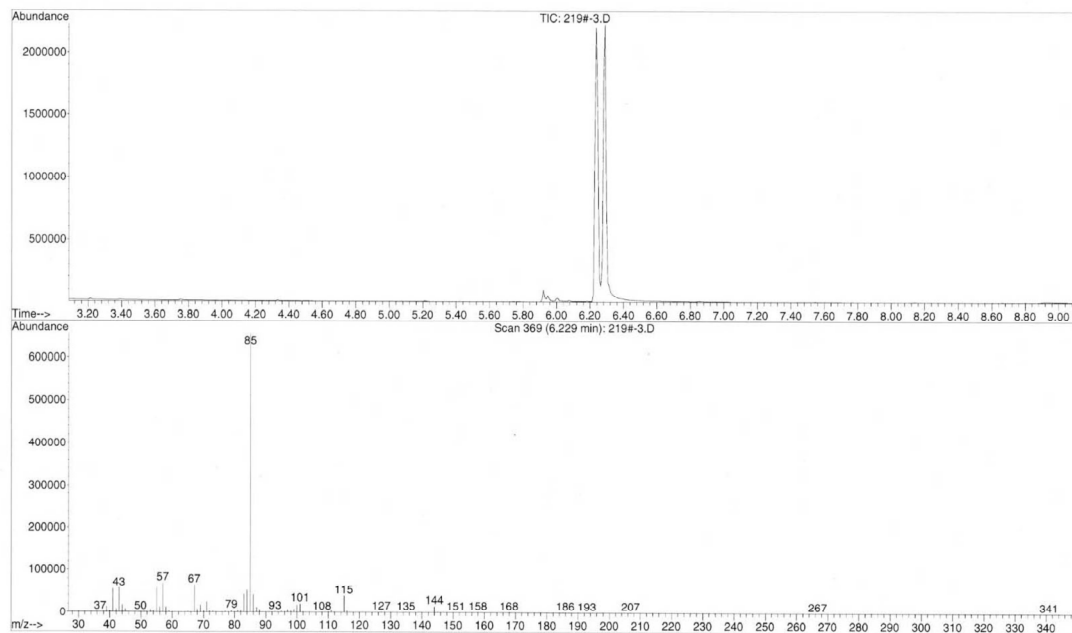

File : C:\MSDCHEM\1\DATA\GUO\219#-3.D  
Operator : Guo  
Acquired : 24 Dec 2004 00:44 using AcqMethod UOZUM11  
Instrument : Instrumen  
Sample Name: 219#-3  
Misc Info : C.C., collection  
Vial Number: 1

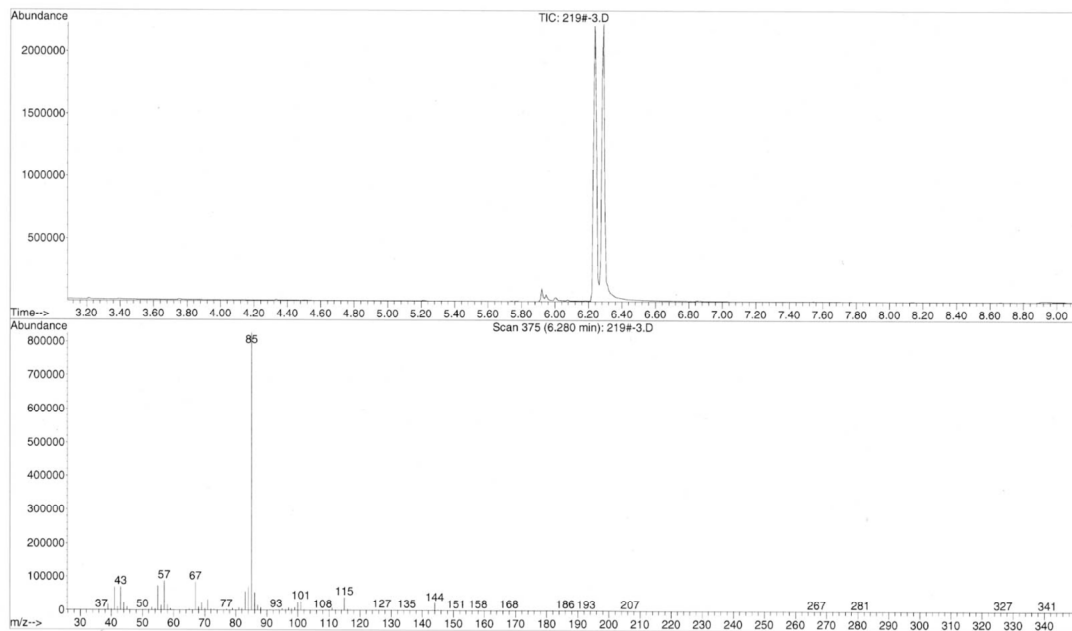

**5g** (*cis* and *trans* isomers)

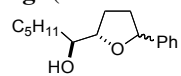

File : C:\MSDCHEM\1\DATA\GUO\231#-5.D  
Operator : Guo  
Acquired : 13 Jan 2005 23:24 using AcqMethod UOZUM11  
Instrument : Instrumen  
Sample Name: 231#-5  
Misc Info : C.C., 15tube  
Vial Number: 1

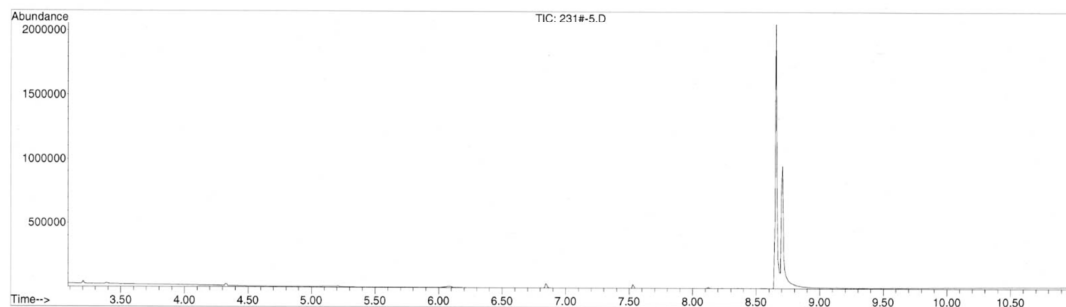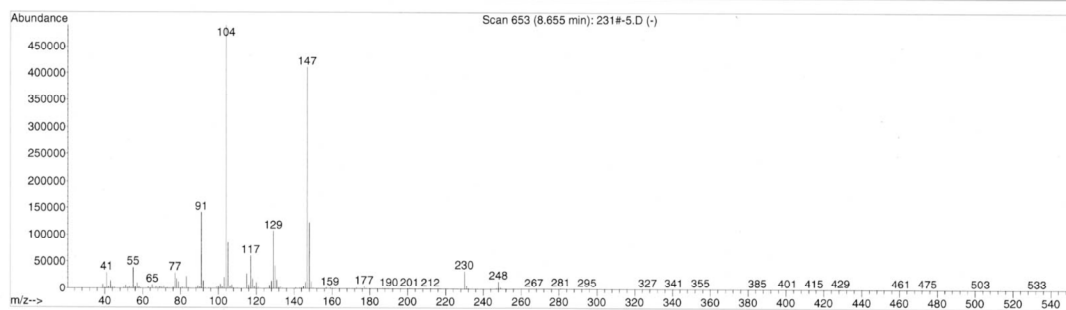

File : C:\MSDCHEM\1\DATA\GUO\231#-5.D  
Operator : Guo  
Acquired : 13 Jan 2005 23:24 using AcqMethod UOZUM11  
Instrument : Instrumen  
Sample Name: 231#-5  
Misc Info : C.C., 15tube  
Vial Number: 1

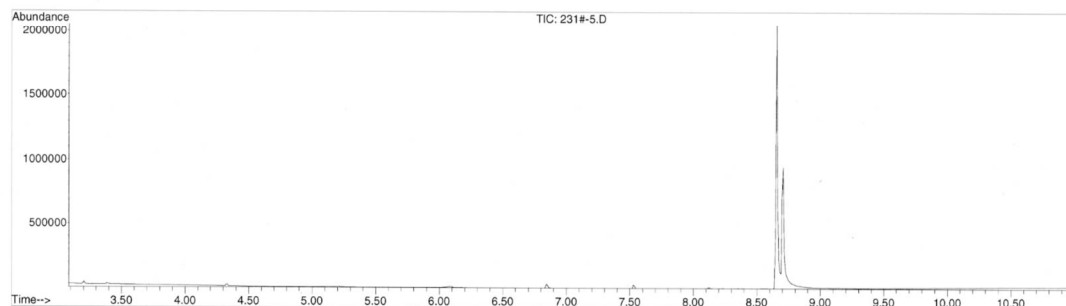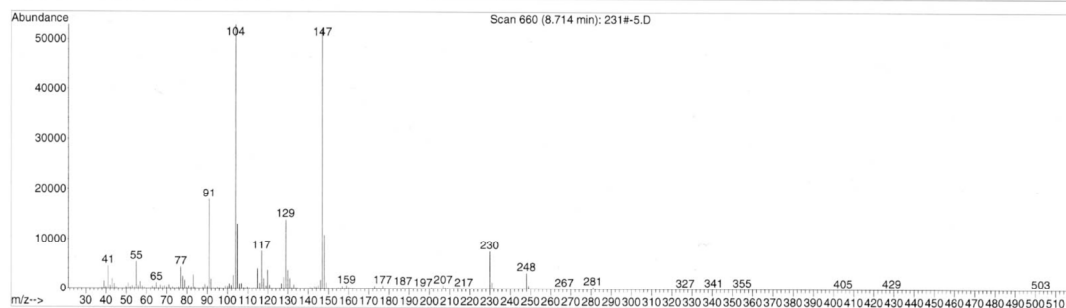

**7a**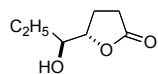

File : C:\MSDCHEM\1\DATA\GUO\Snapshot\261T.D  
 Operator : Guo  
 Acquired : 26 Jun 2006 10:25 using AcqMethod UOZUMI1  
 Instrument : Instrumen  
 Sample Name : #261  
 Misc Info :  
 Vial Number: 1

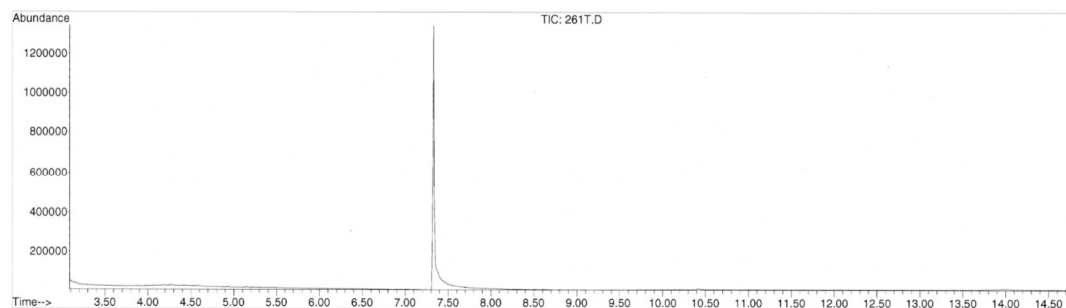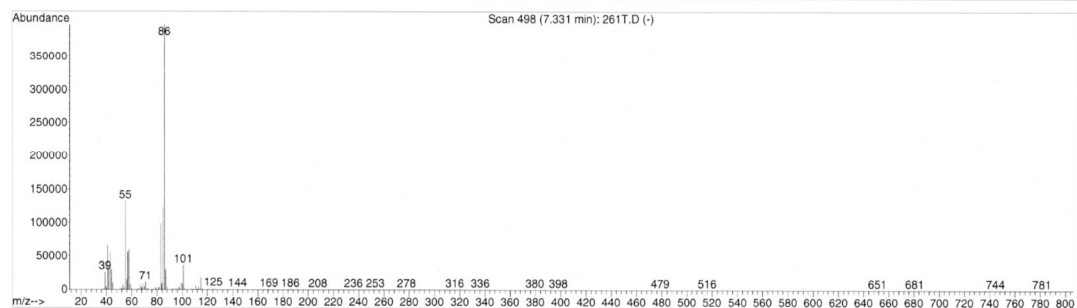**7b**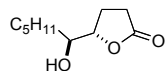

File : C:\MSDCHEM\1\DATA\GUO\262#-7.D  
 Operator : Guo  
 Acquired : 3 Mar 2005 18:41 using AcqMethod UOZUMI1  
 Instrument : Instrumen  
 Sample Name : 262#-7  
 Misc Info : C.C, 28th  
 Vial Number: 1

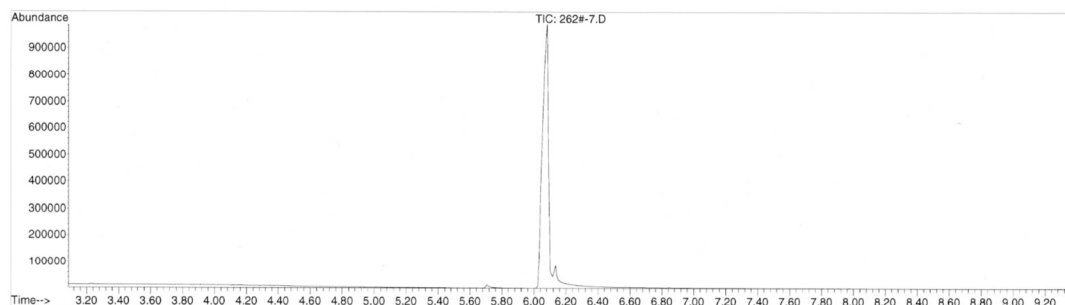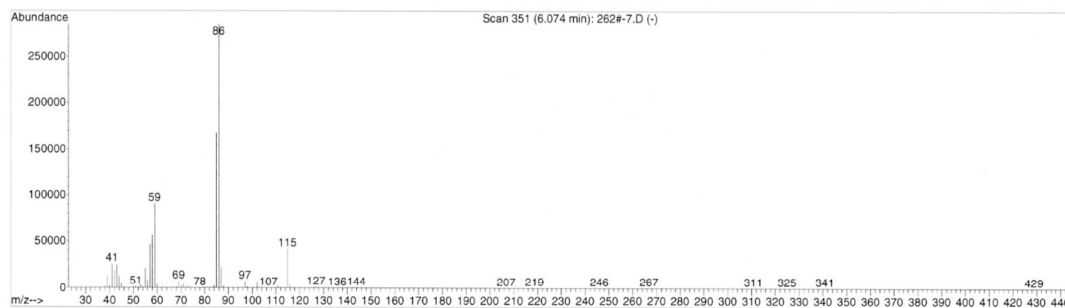

7c

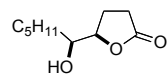

File : C:\MSDCHEM\1\DATA\GUO\250#-5.D  
Operator : Guo  
Acquired : 14 Feb 2005 19:12 using AcqMethod UOZUMI1  
Instrument : Instrumen  
Sample Name: 250#-5  
Misc Info : C.C., 1stube  
Vial Number: 1

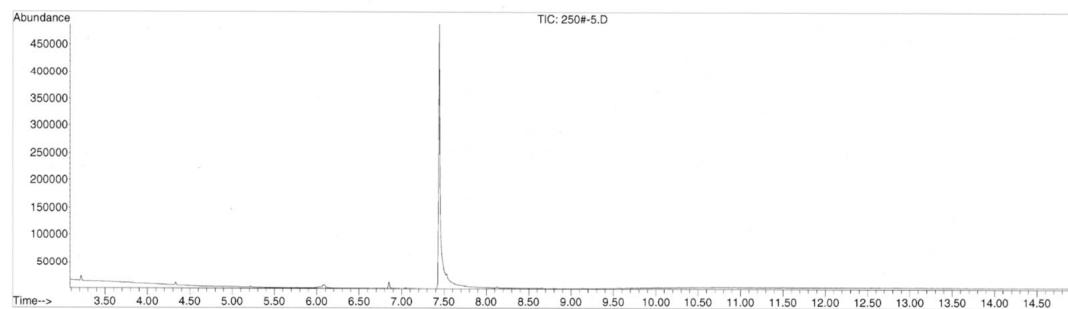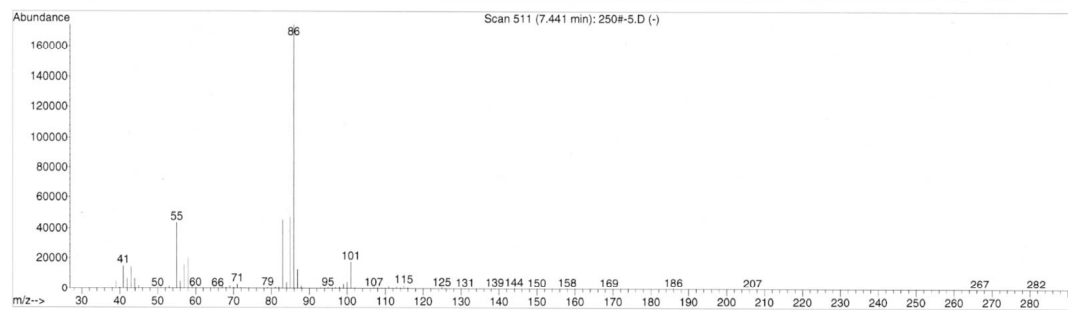

Supplement: Supplementary file 1 [file 4714708]
